# Supplementary material for: City mouse, country mouse: a mixed-methods evaluation of perceived communication barriers between rural family physicians and urban consultants in Newfoundland and Labrador, Canada
Source: PubMed Central journal article supplement — BMJ Open. 2016 May 6;6(5):e010153. doi: 10.1136/bmjopen-2015-010153 (PMC4861124; doi:10.1136/bmjopen-2015-010153), 2016-05-06
Supplement: bmjopen-2015-010153supp_appendix1.pdf [file bmjopen-2015-010153supp_appendix1.pdf]

# Country Mouse, City Mouse: Examining Communication Barriers between Rural Physicians and Urban Consultants in Newfoundland and Labrador

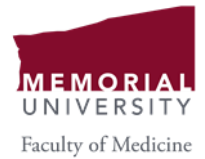

## URBAN CONSULTANTS SURVEY

1. What is your specialty? \_\_\_\_\_

2. What is your gender? \_\_\_\_\_

3. Have you experienced communication difficulties with rural physicians?

FREQUENTLY  SOMETIMES  NEVER

Please explain. \_\_\_\_\_

---

---

---

4. Is there a particular setting/context in which communication difficulties typically happen?

---

---

---

---

5. Did the communication difficulties impact patient care?

FREQUENTLY  SOMETIMES  NEVER

6. Do you think patients are sent for consult unnecessarily or without adequate investigation by the rural physician?

FREQUENTLY  SOMETIMES  NEVER

7. What do you think are the barriers to communication between rural physicians and urban consultants?

---

---

---

---

8. Have you experienced communication with rural physicians working well?

- FREQUENTLY    SOMETIMES    NEVER

Please explain. \_\_\_\_\_  
\_\_\_\_\_  
\_\_\_\_\_  
\_\_\_\_\_

9. How can communication between rural physicians and urban consultants be improved? \_\_\_\_\_

\_\_\_\_\_  
\_\_\_\_\_  
\_\_\_\_\_  
\_\_\_\_\_

10. Do you see a role for simulation in helping to solve communication barriers?    YES    NO

11. What types of simulation would work best in your context and why?

- Standardized Patients
- Role Playing (Peer-to-Peer)
- Virtual Patients
- Task Trainers
- Surgical Skills
- Human Patient Simulators/Mannequins
- Other \_\_\_\_\_

Please explain. \_\_\_\_\_  
\_\_\_\_\_  
\_\_\_\_\_  
\_\_\_\_\_

Thank you for participating!
