# Supplementary material for: City mouse, country mouse: a mixed-methods evaluation of perceived communication barriers between rural family physicians and urban consultants in Newfoundland and Labrador, Canada
Source: PubMed Central journal article supplement — BMJ Open. 2016 May 6;6(5):e010153. doi: 10.1136/bmjopen-2015-010153 (PMC4861124; doi:10.1136/bmjopen-2015-010153), 2016-05-06
Supplement: bmjopen-2015-010153supp_appendix2.pdf [file bmjopen-2015-010153supp_appendix2.pdf]

# Country Mouse, City Mouse: Examining Communication Barriers between Rural Physicians and Urban Consultants in Newfoundland and Labrador

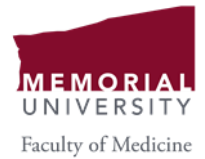

## RURAL PHYSICIANS SURVEY

1. Where do you practice (community name)? \_\_\_\_\_  
\_\_\_\_\_

2. What is your gender? \_\_\_\_\_

3. Have you experienced communication difficulties with urban specialists?

FREQUENTLY  SOMETIMES  NEVER

Please explain. \_\_\_\_\_  
\_\_\_\_\_  
\_\_\_\_\_

4. Is there a particular setting/context in which communication difficulties typically happen?

\_\_\_\_\_  
\_\_\_\_\_  
\_\_\_\_\_

5. Did the communication difficulties impact patient care?

FREQUENTLY  SOMETIMES  NEVER

6. Do you ever think patients are discharged too early from the hospital?

FREQUENTLY  SOMETIMES  NEVER

7. What do you think are the barriers to communication between rural physicians and urban consultants?

\_\_\_\_\_  
\_\_\_\_\_  
\_\_\_\_\_

8. Have you experienced communication with urban specialists working well?

- FREQUENTLY  SOMETIMES  NEVER

Please explain. \_\_\_\_\_  
\_\_\_\_\_  
\_\_\_\_\_  
\_\_\_\_\_

9. How can communication between rural physicians and urban consultants be improved? \_\_\_\_\_

\_\_\_\_\_  
\_\_\_\_\_  
\_\_\_\_\_  
\_\_\_\_\_

10. Do you see a role for simulation in helping to solve communication barriers?  YES  NO

11. What types of simulation would work best in your context and why?

- Standardized Patients
- Role Playing (Peer-to-Peer)
- Virtual Patients
- Task Trainers
- Surgical Skills
- Human Patient Simulators/Mannequins
- Other \_\_\_\_\_

Please explain. \_\_\_\_\_  
\_\_\_\_\_  
\_\_\_\_\_  
\_\_\_\_\_

Thank you for participating!
